# Supplementary material for: Enhanced regeneration of bone defects using sintered porous Ti6Al4V scaffolds incorporated with mesenchymal stem cells and platelet-rich plasma
Source: Royal Society of Chemistry journal article supplement (doi:10.1039/d0ra10215f), 2021-01-01
Supplement: d0ra10215f1.pdf [file d0ra10215f1.pdf]

## Supplementary Materials

### **Enhanced Regeneration of Bone Defects Using Sintered Porous Ti6Al4V Scaffolds Incorporated with Mesenchymal Stem Cells and Platelet-Rich Plasma**

Ji Li<sup>a†</sup>, Ketao Wang<sup>a,b†</sup>, Xiaowei Bai<sup>a</sup>, Qi Wang<sup>a</sup>, Ningyu Lv<sup>a</sup>, Zhongli Li<sup>a\*</sup>

<sup>a</sup>*Department of Orthopedics, General Hospital of PLA, No.28 Fuxing Road, Haidian District, Beijing, China*

<sup>b</sup>*Department of Orthopedic Surgery, Zhongshan Hospital, Fudan University, Shanghai, China*

†: Ji Li and Ketao Wang contributed equally to this work

\*: Corresponding author. Tel.: +86 010 66938306; fax: +86 010 66938306; E-mail address: [lizhongli@263.net](mailto:lizhongli@263.net)

## Tables

**Table S1.** The sequences of primers

| Primer    | Sequence 5' to 3'       |
|-----------|-------------------------|
| h GAPDH-F | GCCTTCCGTGTCCCCACTGC    |
| h GAPDH-R | GGCTGGTGGTCCAGGGGTCT    |
| hRUNX2-F  | CAGTCTTACCCCTCCTACCT    |
| hRUNX2-R  | AGTTCTGAAGCACCTGCCT     |
| hALP-F    | TGACAGCTGCCAGGATCCTA    |
| hALP-R    | CTTTCTTGGCCCGATTCATC    |
| hBSP-F    | CTGCTACAACACTGGGCTAT    |
| hBSP-R    | CCTTCTTCTCCATTGTCTCC    |
| hCol-1-F  | ATGACCGATGGATTCCCGTTC   |
| hCol-1-R  | ACGCTGTTCTTGCAGTGATAGGT |
| hOC-F     | CACTCCTCGCCCTATTGGC     |
| hOC-R     | CCCTCCTGCTTGGACACAAAG   |

**Table S2.** The ELISA results of PRP released growth factors

| Growth Factors | PRP (ng/ml) | Whole Blood (ng/ml) | Times |
|----------------|-------------|---------------------|-------|
| PDGH-AB        | 80.96±15.45 | 14.98±5.23          | 5.4   |
| TGF-β1         | 70.6±10.54  | 18.58±4.56          | 3.8   |
| IGF-1          | 62.27±6.39  | 18.87±3.29          | 3.3   |
| b-FGF          | 0.856±0.293 | 0.329±0.157         | 2.6   |

## Figures

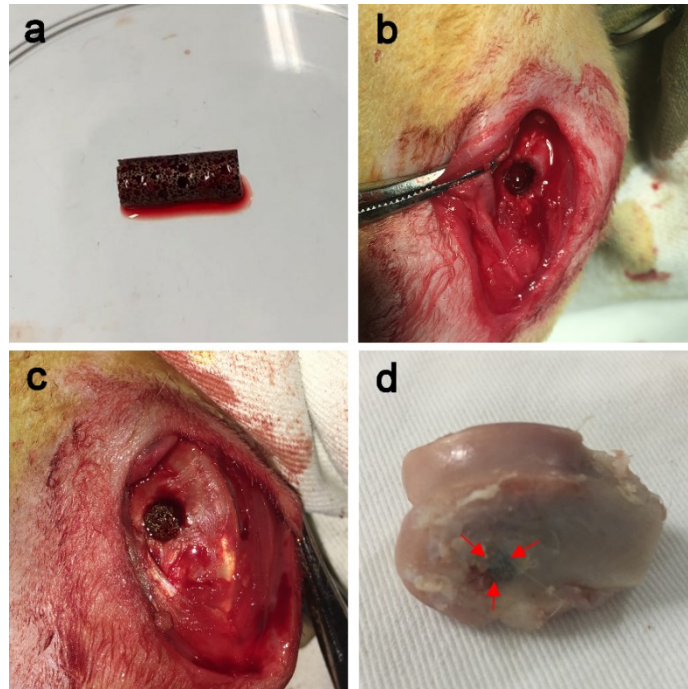

**Fig.S1.** (a) Exterior morphology of Ti6Al4V/MSC/PRP construct; (b) and (c) the surgical procedures; (d) The retrieved femora and implant.

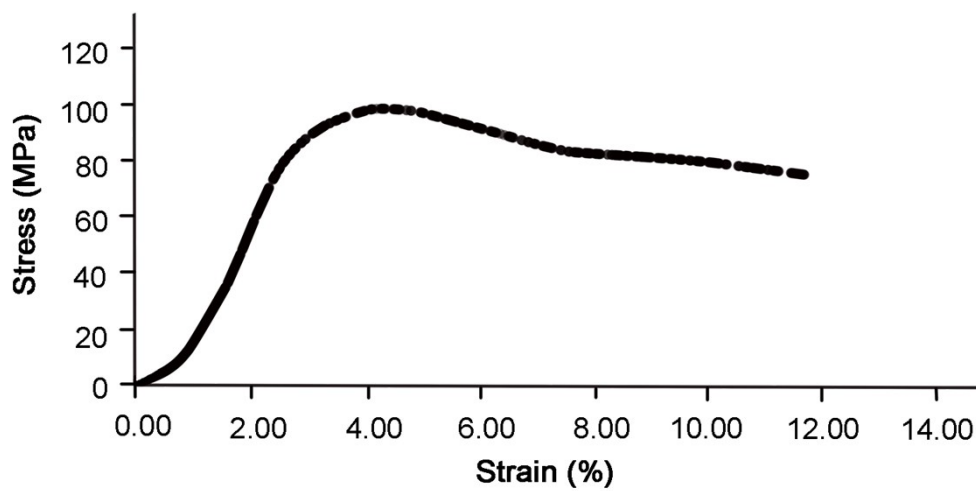

**Fig.S2.** Stress-strain curves of the two type of porous samples.

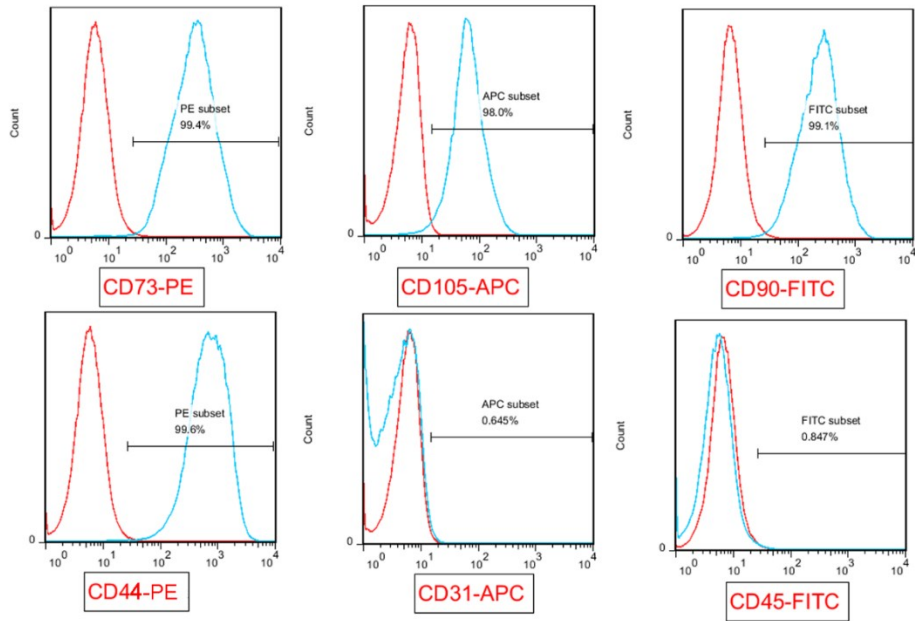

**Fig.S3** Immunophenotypes of MSCs: markers of CD73, CD105, CD90, CD44, CD31, and CD45.

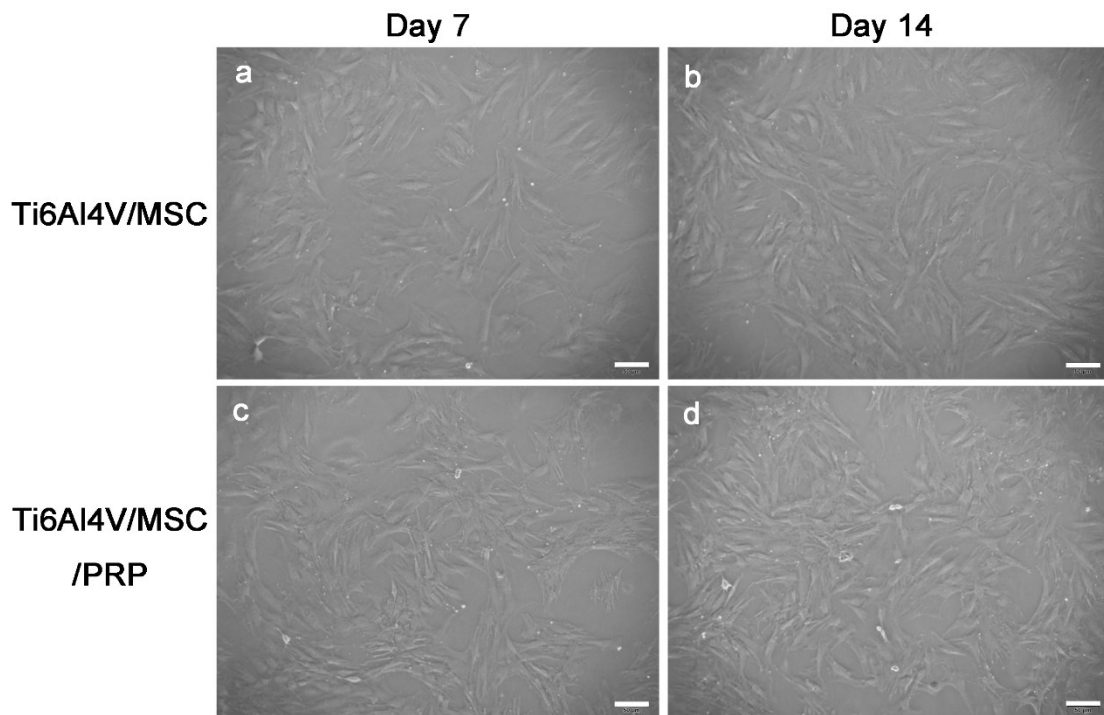

**Fig.S4.** The morphologies of MSCs at 7 days and 14 days in the two groups.
